# Supplementary material
Source: Springer Nature journal article supplement (https://www.springermedizin.de/resource/supplementary/13075_2004_1205_MOESM1_ESM.pdf/9689218)

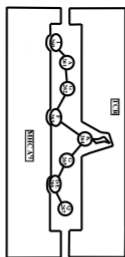

T (260-267)

CII triple helical structure

C1<sup>1</sup> (358-363)

GARGLT

J1 (551-564)

MPGERGAAGIAGPK

Supplement: MOESM1 [file 9689218]
